# Supplementary material for: Boosting interlayer charge transfer in polymeric carbon nitride by Mo ions for efficient photocatalytic H2 evolution
Source: Royal Society of Chemistry journal article supplement (doi:10.1039/d3ya00485f), 2023-12-22
Supplement: d3ya00485f1.pdf [file d3ya00485f1.pdf]

## Supporting Information

# Boost Interlayer Charge Transfer in Polymeric Carbon Nitride by Mo Ion for Efficient Photocatalytic H<sub>2</sub> evolution

*Feng Liu*‡, *Wencheng Li*‡, *Xi Rao*, *Shaohui Zheng*\*, and *Yongping Zhang*\*

School of Materials and Energy, Southwest University, Chongqing 400715, China

\*Corresponding authors, E-mail: [shaohuizheng@swu.edu.cn](mailto:shaohuizheng@swu.edu.cn) (S. Zheng),

[zhangyyping6@swu.edu.cn](mailto:zhangyyping6@swu.edu.cn) (Y. Zhang)

‡These authors contributed equally to this work.

Table S1 Comparison of the hydrogen evolution rate (HER) of Mo doped g-C<sub>3</sub>N<sub>4</sub> photocatalysts from different literatures.

| Photocatalyst (Mo/g-C <sub>3</sub> N <sub>4</sub> precursors) | HER rate [μmol/(h•g)] | Light source              | Reaction conditions      | Reference |
|---------------------------------------------------------------|-----------------------|---------------------------|--------------------------|-----------|
| Sodium molybdate<br>Urea                                      | 1666                  | 500 W Xe lamp, λ > 420 nm | 3 wt% Pt<br>17 vol% TEOA | This work |
| Ammonium molybdate<br>Melamine                                | 800                   | 300 W Xe lamp, λ > 420 nm | 3 wt% Pt<br>10 vol% TEOA | [1]       |
| Ammonium molybdate<br>Melamine                                | 2008                  | 300 W Xe lamp, λ > 420 nm | 3 wt% Pt<br>10 vol% TEOA | [2]       |
| Ammonium molybdate<br>Melamine                                | 887                   | 300 W Xe lamp, λ > 380 nm | 3 wt% Pt<br>17 vol% TEOA | [3]       |
| Sodium molybdate<br>Melamine                                  | 641                   | 300 W Xe lamp, λ > 380 nm | 3 wt% Pt<br>17 vol% TEOA | [4]       |
| Ammonium tetrathiomolybdate<br>Urea                           | 773                   | 300 W Xe lamp, λ > 420 nm | 1 wt% Pt<br>10 vol% TEOA | [5]       |
| Sodium molybdate<br>Dicyandiamide                             | 1124                  | 300 W Xe lamp, λ ≥ 400 nm | 3 wt% Pt<br>20 vol% TEOA | [6]       |
| Ammonium molybdate<br>Melamine                                | 955                   | 300 W Xe lamp, λ ≥ 400 nm | 3 wt% Pt<br>20 vol% TEOA | [7]       |



**Figure S2** Calculated total density of states and partial density of states of (a) pure CN, (b) Mo<sup>6+</sup>-CN, (c) Mo<sup>4+</sup>-CN.

The calculated density of states (DOS) is shown in Figure S2, and the density of states of pure phase g-C<sub>3</sub>N<sub>4</sub> is shown in Fig. It is mainly the aromatic ring structure with C–N as the skeleton. As shown in Figure S2 (b) and (c), the orange curve (Mo) is obviously positive in the range of - 5 eV to 5 eV, indicating that Mo mainly contributes to the g-C<sub>3</sub>N<sub>4</sub> conduction band, thus changing the electronic structure of g-C<sub>3</sub>N<sub>4</sub>.

## References

- [1] H. Che, C. K. Ngaw, P. Hu, J. Wang, Y. Li, X. Wang, W. Teng, Fabrication of molybdenum doped carbon nitride nanosheets for efficiently photocatalytic water splitting, *J. Alloys Compd* **2020**, 849.
- [2] Y. Wang, Y. Zhang, S. Zhao, Z. Huang, W. Chen, Y. Zhou, X. Lv, S. Yuan, Bio-template synthesis of Mo-doped polymer carbon nitride for photocatalytic hydrogen evolution, *Appl. Catal. B* **2019**, 248, 44-53.
- [3] Y. Wang, Y. Xu, Y. Wang, H. Qin, X. Li, Y. Zuo, S. Kang, L. Cui, Synthesis of Mo-doped graphitic carbon nitride catalysts and their photocatalytic activity in the reduction of CO<sub>2</sub> with H<sub>2</sub>O, *Catal. Commun* **2016**, 74, 75-79.
- [4] X.-W. Guo, S.-M. Chen, H.-J. Wang, Z.-M. Zhang, H. Lin, L. Song, T.-B. Lu, Single-atom molybdenum immobilized on photoactive carbon nitride as efficient photocatalysts for ambient nitrogen fixation in pure water, *J. Mater. Chem. A* **2019**, 7, 19831-19837.
- [5] H. Zhao, S. Sun, Y. Wu, P. Jiang, Y. Dong, Z. J. Xu, Ternary graphitic carbon nitride/red phosphorus/molybdenum disulfide heterostructure: An efficient and low cost photocatalyst for visible-light-driven H<sub>2</sub> evolution from water, *Carbon* **2017**, 119, 56-61.
- [6] J. Sun, S. Yang, Z. Liang, X. Liu, P. Qiu, H. Cui, J. Tian, Two-dimensional/one-dimensional molybdenum sulfide (MoS<sub>2</sub>) nanoflake/graphitic carbon nitride (g-C<sub>3</sub>N<sub>4</sub>) hollow nanotube photocatalyst for enhanced photocatalytic hydrogen production activity, *J Colloid Interface Sci* **2020**, 567, 300-307.
- [7] J. Dong, Y. Shi, C. Huang, Q. Wu, T. Zeng, W. Yao, A New and stable Mo-Mo<sub>2</sub>C modified g-C<sub>3</sub>N<sub>4</sub> photocatalyst for efficient visible light photocatalytic H<sub>2</sub> production, *Appl. Catal. B* **2019**, 243, 27-35.
